# Supplementary material for: Highly efficient recycling of a “sandwich” type polyoxometalate oxidation catalyst using solvent resistant nanofiltration
Source: Royal Society of Chemistry journal article supplement (doi:10.1039/b416096g), 2005-01-01
Supplement: b416096g.pdf [file b416096g.pdf]

## Supplementary material

### *Catalyst generation*<sup>1</sup>

Na<sub>2</sub>WO<sub>4</sub>·2H<sub>2</sub>O (62.5 g, 0.19 mol) was dissolved in water (175 mL) at 85 °C. At this temperature, aqueous 37 % HCl (13.3 mL, 0.16 mol) was added. The yellow solid that was formed dissolved almost immediately, and the reaction mixture was heated to 95 °C. A solution of ZnCl<sub>2</sub> (6.81 g, 50 mmol) in water (75 mL) was added drop wise in 4 hours to the well-stirred solution. The slightly turbid mixture was added to a solution of Aliquat 336 (40 g, 0.10 mol) in toluene, and the mixture was stirred for 6 hours. The layers were separated and the aqueous layer was washed with pure toluene. The combined toluene layers were dried on Na<sub>2</sub>SO<sub>4</sub> and the Zn-content was measured by ICP-AES (see below). A POM-concentration of 6.4 mM Q<sub>12</sub>POM in toluene was calculated.

### *Retention measurements of Q<sub>12</sub>POM stock solution*

|                   | Pressure (bar) | Zn   |       | W    |       | Retention based on |        |
|-------------------|----------------|------|-------|------|-------|--------------------|--------|
|                   |                | g/kg | mg/kg | g/kg | mg/kg | Zn                 | W      |
| Starting solution |                | 0.21 |       | 1.42 |       | -                  | -      |
| Sample 1          | 5.4            |      | 0.12  |      | 1.5   | >99.9%             | 99.9%  |
| Sample 2          | 8.9            |      | 0.09  |      | 0.4   | >99.9%             | >99.9% |
| Sample 3          | 10.5           |      | 0.05  |      | 2.1   | >99.9%             | 99.9%  |
| Sample 4          | 11.2           |      | 0.05  |      | 2.3   | >99.9%             | 99.8%  |
| Sample 5          | 12.9           |      | 0.03  |      | 3.8   | >99.9%             | 99.7%  |
| Retentate         |                | 0.23 |       | 1.57 |       | -                  | -      |

### *Q<sub>12</sub>POM recycling*

|            | Amount permeate g | Zn    |       | Retention based on |       |
|------------|-------------------|-------|-------|--------------------|-------|
|            |                   | mg/kg | mg/kg | Zn                 | W     |
| Permeate 1 | 9.04              | 0.5   | 272   | >99.9%             | 97.8% |
| Permeate 2 | 8.14              | <0.2  | 133   | >99.9%             | 99.0% |
| Permeate 3 | 10.75             | 13    | 685   | 98.6%              | 93.4% |
| Permeate 4 | 10.54             | 0.8   | 335   | >99.9%             | 96.9% |
| Permeate 5 | 10.68             | 0.3   | 143   | >99.9%             | 98.7% |

### Membrane preparation

The  $\gamma$ -alumina membrane consists of a macroporous  $\alpha$ -alumina support and a thin mesoporous  $\gamma$ -alumina layer. The  $\alpha$ -alumina supports were made by colloidal filtration of well-dispersed 0.4  $\mu\text{m}$   $\alpha$ -alumina particles (AKP-30, Sumitomo). The dispersion was stabilized by peptizing with nitric acid. After drying at room temperature, the filter compact was sintered at 1100°C. Flat disks of  $\varnothing$  39 mm and 2.0 mm thickness were obtained after machining and polishing. The final porosity of these supports is  $\sim$ 30% and the average pore size is in the range of 80-120 nm. Mesoporous  $\gamma$ -alumina membranes of  $\sim$ 3 mm thickness were prepared by dip-coating twice the above-mentioned porous  $\alpha$ -alumina supports in a boehmite sol, followed by drying and calcining at 600°C for 1 h (heating/cooling rates 0.5°C/min)

### Membrane analysis

The  $\gamma$ -alumina membrane was characterized by permoporometry.<sup>2</sup> The pore size ( $d$ , in nm) is defined by  $d = 2 \cdot (r_K + t)$ , where  $r_K$  is the Kelvin radius, and  $t$  the layer thickness of the  $t$ -layer ( $\sim$ 0.3 nm).

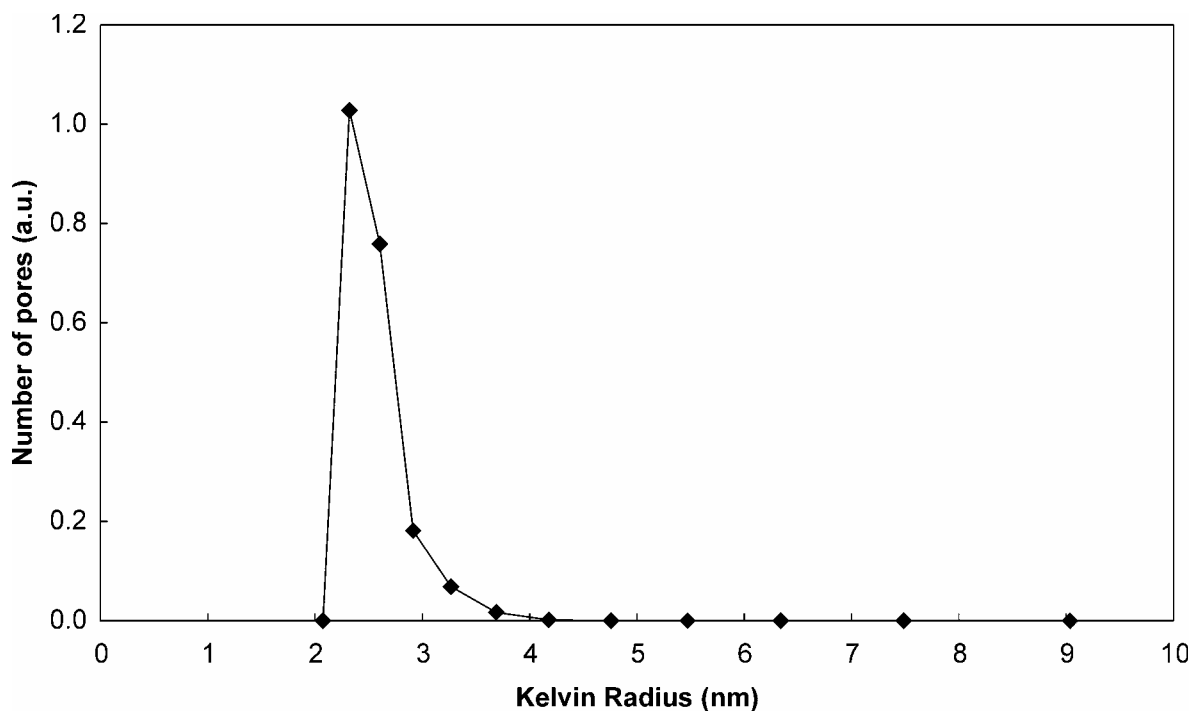

### XPS measurements

X-ray Photoelectron Spectroscopy (PHI Quantera Scanning ESCA Microprobe, USA) with Ar<sup>+</sup> sputtering was carried out to identify the atomic concentrations of O, Al, Zn, and W by measuring the O 1s, Al 2p, Zn 2p3, and W 4f spectra as a function of depth inside the layer at a sputter rate of 17.9 nm/min.

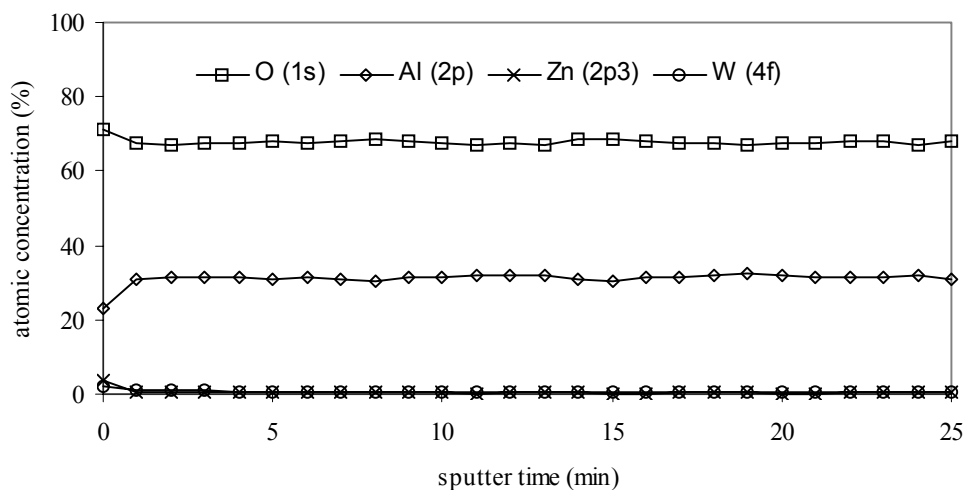

| Sputter time (minutes) | O 1s  | Al 2p | Zn 2p3 | W 4f |
|------------------------|-------|-------|--------|------|
| 0                      | 71,39 | 22,93 | 3,69   | 1,98 |
| 1                      | 67,79 | 30,75 | 0,28   | 1,17 |
| Average of 2-25        | 67,67 | 31,38 | 0,31   | 0,64 |

### References:

- 1 C.M. Tourné, G.F. Tourné and F. Zonnevjlle, *J. Chem. Soc. Dalton Trans.*, 1991, 431.
- 2 N. Benes, A. Nijmeijer and H. Verweij, *Mesoporous silica membranes*, in: N.K. Kanellopoulos, ed., *Recent Advances in Gas Separation by Microporous Ceramic Membranes*, Elsevier, Amsterdam, 2000.
